# Supplementary material
Source: ML conference proceedings conference paper supplement (https://openaccess.thecvf.com/content/ICCV2025/html/Fang_Unfolding-Associative_Encoder-Decoder_Network_ICCV_2025_paper.html)
Supplement: Supplementary file 1 [file Fang_Unfolding-Associative_Encoder-Decoder_Network_ICCV_2025_supplemental.pdf]

# Unfolding-Associative Encoder-Decoder Network with Progressive Alignment for Pansharpening

## Supplementary Material

### Overview

**All source code will be made publicly available for further research.**

In this supplementary material, we present more details about our study, including:

- Sec. 1 provides the mathematical model of UED-Net based on C-SALSA solver.
- Sec. 2 delves into the our configuration of UED-Net to reproduce the experimental results presented in this paper.
- Sec. 3 contains additional comparisons with state-of-the-art (SOTA) methods.
- Sec. 4 discusses more extensive ablation studies, which include the effects of the number of stages (Sec. 4.1) and different cross-stage interactions (Sec. 4.2).

### 1. C-SALSA for UED-Net

#### 1.1. Model Formulation

We design the architecture of UED-Net based on the C-SALSA solver, which effectively decouples mixed constraints to optimize the high-resolution multispectral (HRMS) image processing. To reiterate the description in the main paper, the recovery of  $\mathbf{H}$  from  $\mathbf{L}$  and  $\mathbf{P}$  is modeled using the mathematical formula of the deep unfolding network in UED-Net as follows:

$$\mathbf{H} \in \arg \min_{\mathbf{H}} ||F_{Ge}(\mathbf{H}) - \mathbf{L}|| + |F_{Se}(\mathbf{H}, \mathbf{L})| + |F_{Ga}(\mathbf{H}) - \mathbf{P}| + |F_{Sa}(\mathbf{H}, \mathbf{P})|, \quad (1)$$

where  $|| * ||$  term represents the global degradation-aware fidelity component constrained by the  $\ell_2$ -norm, reflecting the HRMS image's global perception of spatial and spectral modalities, while, the  $| * |$  term, constrained by the  $\ell_1$ -norm, is designed to capture sparse multi-scale prior information. Together, these terms jointly capture comprehensive degradation patterns perceived from the LRMS and PAN images, whose specific forms of these terms are defined in Eq. (13) and Eq. (14) of the main paper.

Next, we solve the constrained problem based on the C-SALSA algorithm. First, by introducing auxiliary variables  $\mathbf{V}_{Ge}$ ,  $\mathbf{V}_{Se}$ ,  $\mathbf{V}_{Ga}$ , and  $\mathbf{V}_{Sa}$ , we split the mixed regularization terms in Eq. (1). This reformulation leads to a new constrained optimization problem:

$$\begin{aligned} \mathbf{H} \in \arg \min_{\mathbf{H}} & ||\mathbf{V}_{Ge}|| + |\mathbf{V}_{Se}| + ||\mathbf{V}_{Ga}|| + |\mathbf{V}_{Sa}|, \\ \text{s.t. } & \mathbf{V}_{Ge} = F_{Ge}(\mathbf{H}) - \mathbf{L}, \mathbf{V}_{Se} = F_{Se}(\mathbf{H}, \mathbf{L}), \\ & \mathbf{V}_{Ga} = F_{Ga}(\mathbf{H}) - \mathbf{P}, \mathbf{V}_{Sa} = F_{Sa}(\mathbf{H}, \mathbf{P}). \end{aligned} \quad (2)$$

Subsequently, we apply the Augmented Lagrangian (AL) method to incorporate penalty terms into the Eq. (2),

transforming it into the following equivalent iterative optimization problem:

$$\begin{aligned} & (\mathbf{H}^{(k)}, \mathbf{V}_{Ge}^{(k)}, \mathbf{V}_{Se}^{(k)}, \mathbf{V}_{Ga}^{(k)}, \mathbf{V}_{Sa}^{(k)}) \min_{\mathbf{H}^{(k)}, \mathbf{V}_{Ge}^{(k)}, \mathbf{V}_{Se}^{(k)}, \mathbf{V}_{Ga}^{(k)}, \mathbf{V}_{Sa}^{(k)}} ||\mathbf{V}_{Se}^{(k)}|| + |\mathbf{V}_{Sa}^{(k)}| + ||\mathbf{V}_{Ge}^{(k)}|| + |\mathbf{V}_{Ga}^{(k)}| \\ & + ||F_{Ga}(\mathbf{H}^{(k)}) - \mathbf{P} - \mathbf{V}_{Ga}^{(k)} - \mathbf{W}_{Ga}^{(k)}|| + ||F_{Sa}(\mathbf{H}^{(k)}, \mathbf{P}) - \mathbf{V}_{Sa}^{(k)} - \mathbf{W}_{Sa}^{(k)}|| \\ & + ||F_{Ge}(\mathbf{H}^{(k)}) - \mathbf{L} - \mathbf{V}_{Ge}^{(k)} - \mathbf{W}_{Ge}^{(k)}|| + ||F_{Se}(\mathbf{H}^{(k)}, \mathbf{L}) - \mathbf{V}_{Se}^{(k)} - \mathbf{W}_{Se}^{(k)}||, \end{aligned} \quad (3)$$

where  $k \in \{0, 1, \dots, N\}$  and  $N$  denotes the maximum number of iterations.  $\mathbf{W}_{Ge}^{(k)}$ ,  $\mathbf{W}_{Ga}^{(k)}$ ,  $\mathbf{W}_{Se}^{(k)}$ , and  $\mathbf{W}_{Sa}^{(k)}$  are the Lagrange multipliers, which store the residuals between hierarchical iterative features and are updated in the  $k^{\text{th}}$  iteration through the following equation:

$$\begin{aligned} \mathbf{W}_{Ge}^{(k)} &= \mathbf{W}_{Ge}^{(k-1)} + \mathbf{f}_{Ge}^{(k)} - \mathbf{V}_{Ge}^{(k-1)}, \\ \mathbf{W}_{Ga}^{(k)} &= \mathbf{W}_{Ga}^{(k-1)} + \mathbf{f}_{Ga}^{(k)} - \mathbf{V}_{Ga}^{(k-1)}, \\ \mathbf{W}_{Se}^{(k)} &= \mathbf{W}_{Se}^{(k-1)} + \mathbf{f}_{Se}^{(k)} - \mathbf{V}_{Se}^{(k-1)}, \\ \mathbf{W}_{Sa}^{(k)} &= \mathbf{W}_{Sa}^{(k-1)} + \mathbf{f}_{Sa}^{(k)} - \mathbf{V}_{Sa}^{(k-1)}, \end{aligned} \quad (4)$$

where  $(\mathbf{f}_{Ge}^{(k)}, \mathbf{f}_{Se}^{(k)})/(\mathbf{f}_{Ga}^{(k)}, \mathbf{f}_{Sa}^{(k)})$  represent the feature representations of the spectral/spatial modalities of the global degradation-aware fidelity and sparse multi-scale prior at the  $k^{\text{th}}$  stage. Similarly, their specific formulations can be found in Eq. (13) and (14) of the main paper.

#### 1.2. Model Solution

Direct solving Eq. (3) is challenging due to inseparable quadratic terms and non-smooth components. To address this, we decouple the mixed constraints, enabling us to minimize three sub-problems alternately, which include the fidelity terms  $(\mathbf{V}_{Ge}^{(k)}, \mathbf{V}_{Ga}^{(k)})$ , the sparse prior terms  $(\mathbf{V}_{Se}^{(k)}, \mathbf{V}_{Sa}^{(k)})$ , and their integration into  $\mathbf{H}^{(k)}$ .

**Update of  $(\mathbf{V}_{Se}^{(k)}, \mathbf{V}_{Sa}^{(k)})$ :** We separate the sparse multi-scale prior terms from Eq. (3), formulating it as a Lasso problem expressed as follows:

$$\begin{aligned} \mathbf{V}_{Se}^{(k)} &\in \arg \min_{\mathbf{V}_{Se}} ||\mathbf{V}_{Se}|| + ||\mathbf{V}_{Se} + \mathbf{f}_{Se}^{(k)} + \mathbf{W}_{Se}^{(k-1)}||, \\ \mathbf{V}_{Sa}^{(k)} &\in \arg \min_{\mathbf{V}_{Sa}} |\mathbf{V}_{Sa}| + ||\mathbf{V}_{Sa} + \mathbf{f}_{Sa}^{(k)} + \mathbf{W}_{Sa}^{(k-1)}||. \end{aligned} \quad (5)$$

To solve this problem effectively and promote sparsity in multi-scale features, we employ the soft-thresholding shrinkage [3] method:

$$\begin{aligned} \mathbf{V}_{Se}^{(k)} &= S_{\epsilon_e}(\mathbf{f}_{Se}^{(k)} + \mathbf{W}_{Se}^{(k-1)}), \\ \mathbf{V}_{Sa}^{(k)} &= S_{\epsilon_a}(\mathbf{f}_{Sa}^{(k)} + \mathbf{W}_{Sa}^{(k-1)}), \end{aligned} \quad (6)$$

where  $\epsilon_e$  and  $\epsilon_a$  are randomly initialized and stage-wise learnable parameters, which control the sparsity enforced

by shrinkage to reduce noise introduced by multi-scale sampling and enhance the representation of multi-scale details. For any  $\epsilon$ , the  $S_\epsilon(\cdot)$  is defined as:

$$S_\epsilon(\cdot) = \text{sgn}(\cdot) \cdot \max(|\cdot| - \epsilon, 0). \quad (7)$$

**Update of  $(\mathbf{V}_{Ge}^{(k)}, \mathbf{V}_{Ga}^{(k)})$ :** Similarly, we decouple the global degradation-aware data fidelity terms from Eq. (3), which are formulated with  $\ell_2$  constraints, encourage smooth degradation representation:

$$\begin{aligned} \mathbf{V}_{Ge}^{(k)} &\in \arg \min_{\mathbf{V}_{Ge}} \|\mathbf{V}_{Ge}\| + \|\mathbf{V}_{Ge} + \mathbf{f}_{Ge}^{(k)} + \mathbf{W}_{Ge}^{(k-1)}\|, \\ \mathbf{V}_{Ga}^{(k)} &\in \arg \min_{\mathbf{V}_{Ga}} \|\mathbf{V}_{Ga}\| + \|\mathbf{V}_{Ga} + \mathbf{f}_{Ga}^{(k)} + \mathbf{W}_{Ga}^{(k-1)}\|, \end{aligned} \quad (8)$$

The approximate solutions for  $\mathbf{V}_{Ge}^{(k)}$  and  $\mathbf{V}_{Ga}^{(k)}$  correspond to orthogonal projections onto an  $\ell_2$  ball of sufficiently small radius [1], expressed as:

$$\begin{aligned} \mathbf{V}_{Ge}^{(k)} &= \mathbf{V}_{Ge}^{(k-1)} + \frac{\mathbf{f}_{Ge}^{(k)} + \mathbf{W}_{Ge}^{(k-1)}}{\|\mathbf{f}_{Ge}^{(k)} + \mathbf{W}_{Ge}^{(k-1)}\|}, \\ \mathbf{V}_{Ga}^{(k)} &= \mathbf{V}_{Ga}^{(k-1)} + \frac{\mathbf{f}_{Ga}^{(k)} + \mathbf{W}_{Ga}^{(k-1)}}{\|\mathbf{f}_{Ga}^{(k)} + \mathbf{W}_{Ga}^{(k-1)}\|}. \end{aligned} \quad (9)$$

In the DUN context, we apply learnable normalization to enhance the generalization of this process:

$$\begin{aligned} \mathbf{V}_{Ge}^{(k)} &= \mathbf{V}_{Ge}^{(k-1)} + \text{GN}_1(F_{Ge}(\mathbf{H}^{(k-1)}, \mathbf{L}) + \mathbf{W}_{Ge}^{(k-1)}), \\ \mathbf{V}_{Ga}^{(k)} &= \mathbf{V}_{Ga}^{(k-1)} + \text{GN}_1(F_{Ga}(\mathbf{H}^{(k-1)}, \mathbf{L}) + \mathbf{W}_{Ga}^{(k-1)}), \end{aligned} \quad (10)$$

where  $\text{GN}_1$  represents the normalization with the number of groups being 1.

**Update of  $\mathbf{H}^{(k)}$ :** We regard updated auxiliary variables as constants and decouple the data terms about  $\mathbf{H}$  from Eq. (3), establishing  $\mathbf{H}^{(k)}$ :

$$\begin{aligned} \mathbf{H}^{(k)} &\in \arg \min_{\mathbf{H}} \|F_{Ga}(\mathbf{H}^{(k)}) - \mathbf{P} - \mathbf{V}_{Ga}^{(k)} - \mathbf{W}_{Ga}^{(k)}\| \\ &\quad + \|F_{Sa}(\mathbf{H}^{(k)}, \mathbf{P}) - \mathbf{V}_{Sa}^{(k)} - \mathbf{W}_{Sa}^{(k)}\| \\ &\quad + \|F_{Ge}(\mathbf{H}^{(k)}) - \mathbf{L} - \mathbf{V}_{Ge}^{(k)} - \mathbf{W}_{Ge}^{(k)}\| \\ &\quad + \|F_{Se}(\mathbf{H}^{(k)}, \mathbf{L}) - \mathbf{V}_{Se}^{(k)} - \mathbf{W}_{Se}^{(k)}\|. \end{aligned} \quad (11)$$

The Eqs. (5) to (10) in UED-Net is outlined as encoding the degraded pattern, while Eq. (11) can be solved using a gradient descent, which is summarized as the following decoding.

We first further combine the spatially and spectrally degradation-aware auxiliary variables to obtain the feature representations of the degradation pattern at this stage,  $\mathbf{f}_{spe}^{(k)}$  and  $\mathbf{f}_{spa}^{(k)}$ , as described in Eq. (19) and (4) of the main paper.

Next, we employ PGAM to calibrate the spatial offsets of  $\mathbf{f}_{spe}^{(k)}$  and  $\mathbf{f}_{spa}^{(k)}$ , regulating the spatial/spectral distributions at this stage to obtain the  $\mathbf{f}_{mm}^{(k)}$ , as detailed in Eq. (5)-(8) of the main paper.

Furthermore, we utilize the customized UAAM to capture cross-stage feature interactions, mitigating noise accumulation across stages to obtain the  $\mathbf{f}_s^{(k)}$ , as described in Eq. (9).

Finally, we adaptively perceive the iteration step size and the gradient descent feature representation  $\nabla \mathbf{H}^{(k-1)}$  using Eq. (10)-(12) of the main paper, and reconstruct the HRMS at the  $k^{\text{th}}$  stage using the following general gradient descent formulation:

$$\mathbf{H}^{(k)} = \mathbf{H}^{(k-1)} + \nabla \mathbf{H}^{(k-1)}. \quad (12)$$

## 2. More Model Reproducible Details

Table 1. Training parameters and model configuration.

| Configurations                                                              | Default Settings                     |
|-----------------------------------------------------------------------------|--------------------------------------|
| Base Learning Rate                                                          | $5 \times 10^{-4}$                   |
| Min Learning Rate                                                           | $5 \times 10^{-8}$                   |
| Optimizer                                                                   | ADAM                                 |
| Weight Decay                                                                | 0                                    |
| Optimizer Momentum                                                          | 0.9, 0.999                           |
| Batch Size                                                                  | 4                                    |
| Training Epochs                                                             | <1000                                |
| Learning Rate Schedule                                                      | Cosineannealing                      |
| Number of Head ( $T$ )                                                      | 4                                    |
| Number of Stages ( $N$ )                                                    | 7                                    |
| Hidden Layer Dimensions ( $S$ )                                             | 16                                   |
| Convolution Initialization                                                  | Kaiming                              |
| $\mu_w^{(s)}, s \in \{1, \dots, S\}$                                        | $8 \cdot (\frac{k}{S-1})^{1.35} - 5$ |
| $\mu_u^{(s)}, s \in \{1, \dots, S\}$                                        | $\log(0.3) + \frac{((k+1)\%3-1)}{2}$ |
| $(\mathbf{V}_{ii}^{(0)}, \mathbf{W}_{ii}^{(0)}), ii \in \{Ge, Ga, Se, Sa\}$ | Zero Matrix                          |
| Other Learnable Parameters                                                  | torch.randn                          |
| Implementation                                                              | PyTorch 2.5.1                        |
| CPU                                                                         | Intel i5-10600KF                     |
| GPU                                                                         | NVIDIA GeForce RTX 4090              |

We use UED-Net with 7 reconstruction stages ( $N = 7$ ) and 16 hidden layers ( $S = 16$ ) as the default model, which is derived from the ablation study on the number of stages in Sec. 4. UED-Net upscales the LRMS using bicubic interpolation to initialize  $\mathbf{H}^{(0)}$ . Additionally, the learnable auxiliary parameters in the UAAM are initialized as described in the RWKV [10]. The auxiliary iterative variables in the SSEM are initialized as zero matrices. Other learnable parameters are initialized with random values from a normal distribution within the range  $[0, 1]$ . We summarize the key training parameters and model configurations in Tab. 1 for a better understanding of our approach.

Based on this experimental configuration, the default UED-Net requires approximately 35 milliseconds for inference on a multispectral image with 4 bands and a spatial size of  $128 \times 128$ .

The supplementary materials include source code and detailed experimental settings required to replicate the findings outlined in this paper. Additionally, the source code will be made publicly available to enhance accessibility and promote reproducibility.

Table 2. Comparison of UED-Net with other methods in simulated tests on reduced-resolution data, with the best result highlighted in **red** and the second best result highlighted in **blue**.

| Dataset  |                | WorldView-II  |               |                |               |               | WorldView-III |               |                |               |               | GaoFen-2      |               |                |               |               | Flops (G) | Params (M) |
|----------|----------------|---------------|---------------|----------------|---------------|---------------|---------------|---------------|----------------|---------------|---------------|---------------|---------------|----------------|---------------|---------------|-----------|------------|
| Metrics  |                | ERGAS↓        | SSIM↑         | PSNR↑          | SCC↑          | SAM↓          | ERGAS↓        | SSIM↑         | PSNR↑          | SCC↑          | SAM↓          | ERGAS↓        | SSIM↑         | PSNR↑          | SCC↑          | SAM↓          |           |            |
| GSA      | (TGRS'07)      | 1.6064        | 0.9266        | 36.9802        | 0.4552        | 0.0373        | 9.1864        | 0.5335        | 21.8331        | 0.6187        | 0.1310        | 1.7981        | 0.8855        | 36.5014        | 0.1284        | 0.0345        | -         | -          |
| SFIM     | (URS'07)       | 1.9651        | 0.9147        | 35.8461        | 0.4534        | 0.0397        | 8.7638        | 0.5483        | 22.1521        | 0.6697        | 0.1243        | 1.5923        | 0.8964        | 37.6654        | 0.1697        | 0.0292        | -         | -          |
| Wavelet  | (IGARSS'01)    | 2.0528        | 0.8765        | 35.1764        | 0.3641        | 0.0484        | 9.4045        | 0.5002        | 21.6659        | 0.0493        | 0.1371        | 2.0188        | 0.8189        | 35.8537        | 0.0243        | 0.0280        | -         | -          |
| SHIP++   | (TPAMI'24)     | 0.9035        | 0.9727        | 42.3276        | 0.5893        | 0.0212        | 3.0152        | 0.9265        | 30.8038        | 0.8309        | 0.0725        | 0.4872        | 0.9900        | 48.3720        | 0.5616        | 0.0094        | 2.9012    | 0.1783     |
| SFINet++ | (TPAMI'24)     | 0.9538        | 0.9675        | 41.5874        | 0.5147        | 0.0236        | 3.0217        | 0.9261        | 30.7665        | 0.8333        | 0.0720        | 0.4376        | 0.9906        | 49.3578        | 0.5897        | 0.0087        | 0.7742    | 0.0487     |
| HFINet   | (CVPR'24)      | 0.9906        | 0.9694        | 41.9026        | 0.5697        | 0.0226        | 3.1523        | 0.9192        | 30.4808        | 0.8156        | 0.0766        | 0.4907        | 0.9891        | 48.3114        | 0.5583        | 0.0090        | 1.0104    | 0.0773     |
| WINet    | (TGRS'24)      | 0.9024        | 0.9714        | 42.0479        | 0.5753        | 0.0226        | 3.1753        | 0.9187        | 30.3268        | 0.8205        | 0.0802        | 0.4472        | 0.9904        | 49.1070        | 0.5630        | 0.0090        | 1.9597    | 0.3336     |
| CANNet   | (CVPR'24)      | 0.9094        | 0.9721        | 41.9689        | 0.5800        | 0.0222        | 3.0980        | 0.9225        | 30.5497        | 0.8233        | 0.0768        | 0.4893        | 0.9902        | 48.3435        | 0.5623        | 0.0094        | -         | -          |
| LFormer  | (MM'24)        | 0.8510        | 0.9730        | 42.5194        | 0.5954        | 0.0226        | 3.0694        | 0.9255        | 30.9709        | 0.8282        | 0.0735        | 0.4551        | 0.9898        | 48.9494        | 0.5619        | 0.0094        | 7.8588    | 0.4494     |
| RFCONet  | (TGRS'24)      | 1.0992        | 0.9663        | 40.3569        | 0.5285        | 0.0233        | 3.3407        | 0.9153        | 29.9527        | 0.8134        | 0.0799        | 0.7378        | 0.9839        | 44.4392        | 0.4492        | 0.0102        | 4.0509    | 5.2089     |
| PDDNet   | (ICCV'23)      | 0.9889        | 0.9702        | 41.3745        | 0.5819        | 0.0240        | 3.3839        | 0.9088        | 29.8436        | 0.8095        | 0.0852        | 0.5098        | 0.9892        | 48.9465        | 0.5440        | 0.0102        | 0.1284    | 0.0395     |
| INNf     | (AAAI'22)      | 0.9176        | 0.9706        | 41.8949        | 0.5756        | 0.0222        | 3.1000        | 0.9216        | 30.5419        | 0.8250        | 0.0745        | 0.4831        | 0.9894        | 48.5199        | 0.5664        | 0.0095        | 1.2201    | 0.0613     |
| DISPNet  | (AAAI'24)      | 0.8759        | 0.9720        | 42.2527        | 0.5837        | 0.0215        | 3.0096        | 0.9267        | 30.8352        | 0.8315        | 0.0720        | 0.4493        | 0.9904        | 49.0900        | 0.5679        | 0.0097        | 27.667    | 1.5669     |
| NLUNet   | (TGRS'23)      | 1.0034        | 0.9644        | 41.0635        | 0.5413        | 0.0246        | 3.2981        | 0.9140        | 29.9715        | 0.8162        | 0.0811        | 0.4976        | 0.9885        | 48.2287        | 0.5458        | 0.0099        | 4.6099    | 0.3062     |
| LGTEUN   | (IJCAI'23)     | 0.8968        | 0.9734        | 42.6766        | 0.5832        | 0.0211        | 3.0151        | 0.9246        | 30.7884        | 0.8291        | 0.0723        | 0.4798        | 0.9894        | 48.5291        | 0.5728        | 0.0097        | 3.2113    | 0.3004     |
| MMNet    | (ECCV'22)      | 0.9600        | 0.9710        | 41.5033        | 0.5703        | 0.0220        | 3.2175        | 0.9171        | 30.3537        | 0.8217        | 0.0778        | 0.6377        | 0.9859        | 45.4227        | 0.4801        | 0.0160        | 4.5953    | 0.0703     |
| MDCUN    | (CVPR'22)      | 1.0060        | 0.9635        | 41.1297        | 0.5274        | 0.0249        | 3.3531        | 0.9111        | 29.8336        | 0.8142        | 0.0828        | 0.4830        | 0.9890        | 48.4141        | 0.5461        | 0.0098        | 118.30    | 0.1538     |
| GPPNN    | (CVPR'21)      | 0.9248        | 0.9702        | 41.8381        | 0.5807        | 0.0222        | 3.0923        | 0.9226        | 30.5770        | 0.8290        | 0.0738        | 0.4812        | 0.9893        | 48.4958        | 0.5596        | 0.0096        | 4.1901    | 0.3594     |
| UED-Net  | Default (7stg) | <b>0.8349</b> | <b>0.9739</b> | <b>42.7251</b> | <b>0.5977</b> | <b>0.0203</b> | <b>2.8918</b> | <b>0.9290</b> | <b>31.1564</b> | <b>0.8370</b> | <b>0.0675</b> | <b>0.4268</b> | <b>0.9910</b> | <b>49.5648</b> | <b>0.5986</b> | <b>0.0077</b> | 2.5097    | 0.1682     |
| UED-Net  | Ours (9stg)    | 0.8349        | 0.9740        | <b>42.7211</b> | 0.5914        | 0.0202        | 2.9021        | <b>0.9292</b> | 31.1272        | 0.8363        | 0.0686        | <b>0.4282</b> | 0.9910        | <b>49.5254</b> | 0.5991        | <b>0.0082</b> | 3.2268    | 0.2163     |
| UED-Net  | Ours (11stg)   | <b>0.8350</b> | <b>0.9740</b> | 42.7172        | <b>0.5960</b> | <b>0.0203</b> | <b>2.8987</b> | <b>0.9292</b> | 31.1380        | <b>0.8365</b> | <b>0.0682</b> | 0.4277        | <b>0.9910</b> | 49.5032        | <b>0.5994</b> | 0.0085        | 3.9439    | 0.2643     |

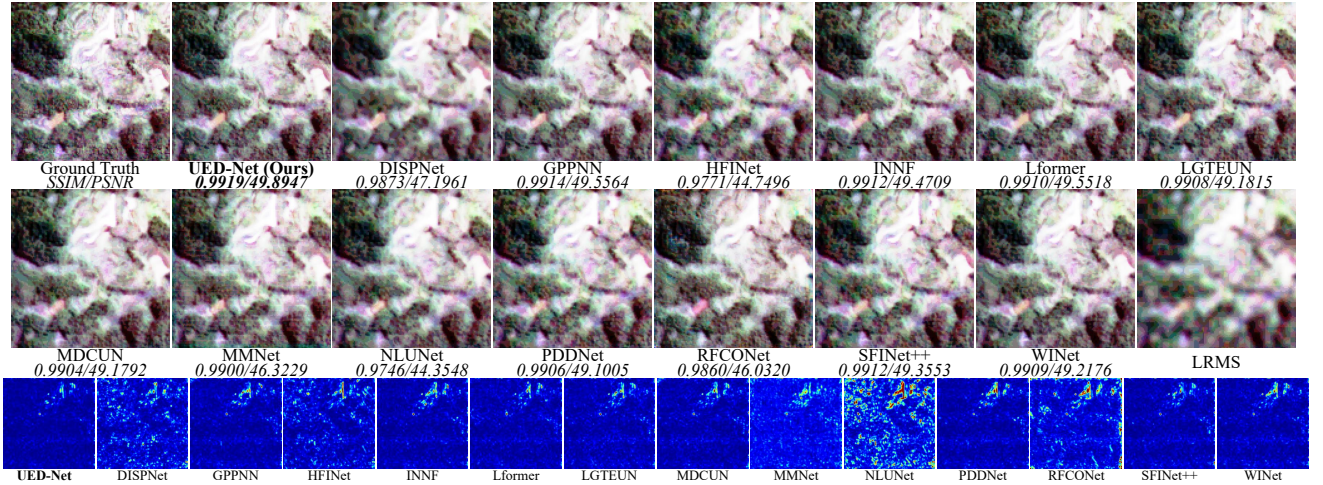

Figure 1. Visual comparison of UED-Net with other methods in simulated tests on GaoFen-2.

### 3. More Comparisons with SOTA Methods

In the main body of this paper, we compare the proposed UED-Net with various representative pansharpening methods, which are configured according to the best settings reported in their respective papers, including (SHIPNet++ [20], CANNet [4], SFINet++ [19], HFINet [12], WINet [17], PDDNet [5], INNf [18], LFormer [6], and RFCONet [11]), (MMNet [15], DISPNet [13], NLUNet [8], LGTEUN [8], MDCUN [16], and GPPNN [14]). In this subsection, we further highlight the significant advantages of UED-Net over these methods and provide a comparison with traditional methods (GSA [2], SFIM [9], Wavelet [7]). Additionally, we present a performance comparison of UED-Net under different representative configurations. In Tab. 2, we present the results of the further sim-

ulation tests, with the best, and second-best performances marked in red, and blue, respectively. The various configurations of UED-Net show significant performance improvements across three datasets. Specifically, on the GaoFen-2 dataset, UED-Net achieves a 0.2048 dB improvement in PSNR over the second-best algorithm, SFINet++; on the WorldView-II dataset, it outperforms the second-best algorithm, LGTEUN, by 0.0486 dB in PSNR; and on the WorldView-III dataset, UED-Net shows a 1.1849 dB improvement in PSNR compared to the second-best algorithm, DISPNet. These results indicate that our proposed method is not dataset-dependent and demonstrates reliable scalability generalization capability.

Furthermore, we present supplementary results on real test in Tab. 3, where our default UED-Net configuration

Table 3. Comparison of UED-Net with other methods in real tests on GaoFen-2 full-resolution data.

| Metrics                | Traditional Methods |         |         | Pure DL-Based Methods |          |         |         |         |         |         |         | Deep Unfolding Methods |                |         |         |                |         |         |                |
|------------------------|---------------------|---------|---------|-----------------------|----------|---------|---------|---------|---------|---------|---------|------------------------|----------------|---------|---------|----------------|---------|---------|----------------|
|                        | GSA                 | SFIM    | Wavelet | SHIP++                | SFINet++ | HFINet  | WINet   | CANNet  | LFormer | RFCNet  | PDDNet  | INNF                   | DISPNet        | NLUNet  | LGTEUN  | MMNet          | MDCUN   | GPPNN   | UED-Net        |
| $D_\lambda \downarrow$ | 0.17344             | 0.16949 | 0.33271 | 0.07208               | 0.07836  | 0.09837 | 0.11871 | 0.07476 | 0.08352 | 0.25559 | 0.07984 | <b>0.07080</b>         | 0.08068        | 0.07628 | 0.11336 | 0.07182        | 0.07649 | 0.09124 | <b>0.06801</b> |
| $D_s \downarrow$       | 0.44336             | 0.30266 | 0.40957 | 0.09838               | 0.08855  | 0.08491 | 0.08273 | 0.09752 | 0.08593 | 0.13758 | 0.10634 | 0.10758                | <b>0.08224</b> | 0.10741 | 0.17165 | <b>0.17053</b> | 0.08860 | 0.09485 | <b>0.07011</b> |
| $QNR \uparrow$         | 0.46010             | 0.57915 | 0.39399 | 0.84930               | 0.84003  | 0.82506 | 0.80838 | 0.83502 | 0.83773 | 0.64309 | 0.82231 | 0.82923                | 0.84371        | 0.82450 | 0.73445 | 0.76990        | 0.84168 | 0.82257 | <b>0.86665</b> |

Table 4. Ablation of the stage number.

| Num of Stage    | 3       | 5       | <b>7 (Default)</b> | 9       | 11      | 13      |
|-----------------|---------|---------|--------------------|---------|---------|---------|
| SSIM $\uparrow$ | 0.9906  | 0.9907  | 0.9910             | 0.9910  | 0.9910  | 0.9910  |
| PSNR $\uparrow$ | 49.3232 | 49.3721 | 49.5648            | 49.5254 | 49.5032 | 49.5121 |
| $QNR \uparrow$  | 0.7756  | 0.8083  | 0.8666             | 0.8645  | 0.8639  | 0.8652  |
| FLOPs           | 1.0756  | 1.7927  | 2.5097             | 3.2268  | 3.9439  | 4.6609  |
| Params          | 0.0721  | 0.1202  | 0.1682             | 0.2163  | 0.2643  | 0.3124  |

continues to exhibit superior performance, particularly in terms of QNR metrics and maintaining a balanced hardware load. Additionally, compared to DUN-based methods, our method incurs the lowest computational cost.

Finally, we include a visual comparison on the GaoFen-2 dataset for simulated tests, as shown in Fig. 1, highlighting both the reconstruction details and visualizations of the mean squared error (MSE). Notably, the comparisons further confirm that our method outperforms other algorithms across multiple scenarios, while offering a competitive performance-to-computation-cost ratio comparable to pure deep learning methods. This validates our hypothesis on the importance of effective cross-modal and cross-stage interactions at different abstraction levels in successful pan-sharpening.

## 4. More Ablation Studies

### 4.1. Number of Stages

We conduct an ablation study on the GaoFen-2 dataset to investigate how the performance of UED-Net varies with computational cost. As shown in Fig. 1 of main paper and Tab. 4, performance improves as we increase the number of stages. We observe that both performance and cost increase significantly with the number of stages. At 7 iterations, we achieve an impressive PSNR of 49.5648 dB in simulated tests and the highest QNR in real tests. After this point, the performance continues to improve slightly in simulated tests but shows some fluctuation. Additionally, we present the results for 9 and 11 stages in WorldView-II and WorldView-III tests, as shown in Tab. 2. Based on the performance-cost trade-off, we use 7 iterations stages as the default configuration for UED-Net.

### 4.2. Cross-stage feature interactions

Building on the ablation study of the UAAM presented in Sec. 4.2 of main paper, we further investigate the benefits of

Table 5. Ablation of cross-stage feature interactions.

| Method  | Simulated Tests |        |         |                |        |         | Real Tests             |                  |                | Calculate Costs |
|---------|-----------------|--------|---------|----------------|--------|---------|------------------------|------------------|----------------|-----------------|
|         | (GaoFen-2)      |        |         | (WorldView-II) |        |         | (GaoFen-2)             |                  |                |                 |
|         | ERGAS↓          | SSIM↑  | PSNR↑   | ERGAS↓         | SSIM↑  | PSNR↑   | $D_\lambda \downarrow$ | $D_s \downarrow$ | $QNR \uparrow$ |                 |
| Net1    | 0.4616          | 0.9896 | 48.8597 | 0.8825         | 0.9718 | 42.2939 | 0.0680                 | 0.0768           | 0.8604         | 1.5051 0.1065   |
| Net2    | 0.4462          | 0.9901 | 49.1483 | 0.8623         | 0.9721 | 42.4275 | 0.9791                 | 0.0100           | 0.8359         | 6.7954 0.4294   |
| Net3    | 0.4443          | 0.9902 | 49.2000 | 0.8593         | 0.9723 | 42.4554 | 0.0797                 | 0.1522           | 0.7802         | 3.6190 0.2364   |
| Default | 0.4268          | 0.9910 | 49.5648 | 0.8349         | 0.9739 | 42.7251 | 0.0680                 | 0.0701           | 0.8666         | 2.5097 0.1682   |

associative attention as a cross-stage interaction mechanism within our proposed UAAM by substituting it with various cross-stage interaction methods. Specifically, Net1 serves as a baseline network without any cross-stage interaction. For Net2, we implement the method proposed in MDCUN [16], which utilizes stacked intermediate variables. For Net3, we employ the LSTM-like stage interaction method outlined in MMNet [15]. As demonstrated in Tab. 5, our method outperforms Net1, Net2, and Net3 across all evaluation metrics, not only in the simulated tests of GaoFen-2 and WorldView-II but also in real tests, while maintaining superior computational efficiency.

## References

- [1] Manyá V. Afonso, José M. Bioucas-Dias, and Mário A. T. Figueiredo. A fast algorithm for the constrained formulation of compressive image reconstruction and other linear inverse problems. In *2010 IEEE International Conference on Acoustics, Speech and Signal Processing*, pages 4034–4037, 2010. 2
- [2] Bruno Aiazzi, Stefano Baronti, and Massimo Selva. Improving component substitution pansharpening through multivariate regression of ms + pan data. *IEEE Transactions on Geoscience and Remote Sensing*, 45(10):3230–3239, 2007. 3
- [3] Amir Beck and Marc Teboulle. A fast iterative shrinkage-thresholding algorithm for linear inverse problems. *SIAM Journal on Imaging Sciences*, 2(1):183–202, 2009. 1
- [4] Yule Duan, Xiao Wu, Haoyu Deng, and Liang-Jian Deng. Content-adaptive non-local convolution for remote sensing pansharpening. In *2024 IEEE/CVF Conference on Computer Vision and Pattern Recognition (CVPR)*, pages 27738–27747, 2024. 3
- [5] Xuanhua He, Keyu Yan, Rui Li, Chengjun Xie, Jie Zhang, and Man Zhou. Pyramid dual domain injection network for pan-sharpening. In *2023 IEEE/CVF International Confer-*



- ence on Computer Vision (ICCV), pages 12862–12871, 2023. [3](#)
- [6] Junming Hou, Zihan Cao, Naishan Zheng, Xuan Li, Xiaoyu Chen, Xinyang Liu, Xiaofeng Cong, Danfeng Hong, and Man Zhou. Linearly-evolved transformer for pansharpening. In *Proceedings of the 32nd ACM International Conference on Multimedia*, pages 1486–1494, New York, NY, USA, 2024. Association for Computing Machinery. [3](#)
- [7] R.L. King and Jianwen Wang. A wavelet based algorithm for pan sharpening landsat 7 imagery. In *IGARSS 2001. Scanning the Present and Resolving the Future. Proceedings. IEEE 2001 International Geoscience and Remote Sensing Symposium (Cat. No.01CH37217)*, pages 849–851 vol.2, 2001. [3](#)
- [8] Xingxing Li, Yujia Li, Guangyao Shi, Liping Zhang, Weisheng Li, and Dajiang Lei. Pansharpening method based on deep nonlocal unfolding. *IEEE Transactions on Geoscience and Remote Sensing*, 61:1–11, 2023. [3](#)
- [9] J. G. Liu. Smoothing filter-based intensity modulation: A spectral preserve image fusion technique for improving spatial details. *International Journal of Remote Sensing*, 21(18): 3461–3472, 2000. [3](#)
- [10] Bo Peng, Daniel Goldstein, Quentin Anthony, Alon Albalak, Eric Alcaide, Stella Biderman, Eugene Cheah, Xingjian Du, Teddy Ferdinan, Haowen Hou, Przemysław Kazienko, Kranthi Kiran GV, Jan Kocoń, Bartłomiej Koptyra, Satyapriya Krishna, Ronald McClelland Jr. au2, Jiaju Lin, Niklas Muenighoff, Fares Obeid, Atsushi Saito, Guangyu Song, Haoqin Tu, Cahya Wirawan, Stanisław Woźniak, Ruichong Zhang, Bingchen Zhao, Qihang Zhao, Peng Zhou, Jian Zhu, and Rui-Jie Zhu. Eagle and finch: RwkV with matrix-valued states and dynamic recurrence, 2024. [2](#)
- [11] Jiahui Qu, Xuyao Liu, Wenqian Dong, Yang Liu, Tongzhen Zhang, Yang Xu, and Yunsong Li. Progressive multi-iteration registration-fusion co-optimization network for unregistered hyperspectral image super-resolution. *IEEE Transactions on Geoscience and Remote Sensing*, 62:1–14, 2024. [3](#)
- [12] Jiangtong Tan, Jie Huang, Naishan Zheng, Man Zhou, Keyu Yan, Danfeng Hong, and Feng Zhao. Revisiting spatial-frequency information integration from a hierarchical perspective for panchromatic and multi-spectral image fusion. In *Proceedings of the IEEE/CVF Conference on Computer Vision and Pattern Recognition (CVPR)*, pages 25922–25931, 2024. [3](#)
- [13] Hebaixu Wang, Meiqi Gong, Xiaoguang Mei, Hao Zhang, and Jiayi Ma. Deep unfolded network with intrinsic supervision for pan-sharpening. *Proceedings of the AAAI Conference on Artificial Intelligence*, 38(6):5419–5426, 2024. [3](#)
- [14] Shuang Xu, Jiangshe Zhang, Zixiang Zhao, Kai Sun, Junmin Liu, and Chunxia Zhang. Deep gradient projection networks for pan-sharpening. In *2021 IEEE/CVF Conference on Computer Vision and Pattern Recognition (CVPR)*, pages 1366–1375, 2021. [3](#)
- [15] Keyu Yan, Man Zhou, Li Zhang, and Chengjun Xie. Memory-augmented model-driven network for pansharpening. In *Computer Vision–ECCV 2022: 17th European Conference, Tel Aviv, Israel, October 23–27, 2022, Proceedings, Part XIX*, pages 306–322. Springer, 2022. [3](#), [4](#)
- [16] Gang Yang, Man Zhou, Keyu Yan, Aiping Liu, Xueyang Fu, and Fan Wang. Memory-augmented deep conditional unfolding network for pansharpening. In *2022 IEEE/CVF Conference on Computer Vision and Pattern Recognition (CVPR)*, pages 1778–1787, 2022. [3](#), [4](#)
- [17] Jie Zhang, Xuanhua He, Ke Ren Yan, Ke Cao, Rui Li, Chengjun Xie, Man Zhou, and Danfeng Hong. Pansharpening with wavelet-enhanced high-frequency information. *IEEE Transactions on Geoscience and Remote Sensing*, 62:1–14, 2024. [3](#)
- [18] Man Zhou, Jie Huang, Yanchi Fang, Xueyang Fu, and Aiping Liu. Pan-sharpening with customized transformer and invertible neural network. *Proceedings of the AAAI Conference on Artificial Intelligence*, 36(3):3553–3561, 2022. [3](#)
- [19] Man Zhou, Jie Huang, Keyu Yan, Danfeng Hong, Xiuping Jia, Jocelyn Chanussot, and Chongyi Li. A general spatial-frequency learning framework for multimodal image fusion. *IEEE Transactions on Pattern Analysis and Machine Intelligence*, pages 1–18, 2024. [3](#)
- [20] Man Zhou, Naishan Zheng, Xuanhua He, Danfeng Hong, and Jocelyn Chanussot. Probing synergistic high-order interaction for multi-modal image fusion. *IEEE Transactions on Pattern Analysis and Machine Intelligence*, pages 1–18, 2024. [3](#)
